# Supplementary material
Source: bioRxiv or medRxiv preprint supplement (https://www.biorxiv.org/highwire/filestream/7627/field_highwire_adjunct_files/4/028324-5.pdf)
Supplement: Supplementary file [file 028324-5.pdf]

**Table S4.** Summary statistics for all *Saccharomyces* and each species using *COX2*.

| Species                | #Seq | s   | k        | $\pi$           | #hap | Hd     | Fs      | Tajima's D | Fu and Li's D   |
|------------------------|------|-----|----------|-----------------|------|--------|---------|------------|-----------------|
| <i>Saccharomyces</i> * | 566  | 106 | 20.90505 | 0.03574±0.00112 | 110  | 0.9629 | -12.371 | 0.28795    | <b>-2.33439</b> |
| <i>S. cerevisiae</i>   | 418  | 51  | 12.274   | 0.02099±0.00015 | 57   | 0.941  | -4.065  | 0.82531    | <b>-5.54661</b> |
| <i>S. paradoxus</i>    | 23   | 32  | 13.581   | 0.02322±0.00093 | 16   | 0.964  | -1.287  | 1.50954    | 0.87179         |
| <i>S. mikatae</i>      | 2    | 11  | 11.000   | 0.01904±0.00940 | 2    | 1      | ND      | ND         |                 |
| <i>S. kudriavzevii</i> | 9    | 25  | 6.500    | 0.01111±0.00524 | 5    | 0.833  | 1.854   | -1.45966   | -1.48111        |
| <i>S. arboricola</i>   | 1    | ND  | ND       | ND              | 1    | ND     | ND      | ND         |                 |
| <i>S. eubayanus</i>    | 31   | 22  | 2.84301  | 0.00514±0.00148 | 12   | 0.856  | -3.362  | -1.69139   | <b>-2.71438</b> |
| <i>S. uvarum</i>       | 34   | 21  | 3.35651  | 0.00607±0.00170 | 8    | 0.731  | 0.729   | -1.29327   | -1.94720        |

#Seq: number of sequences; s: number of segregating sites; k: average number of differences between sequences;  $\pi$ : nucleotide diversity; #hap: number of haplotypes; Hd: haplotype diversity; Fs: Fu's Fs; Tajima's D and Fu and Li's D. Significant values are highlighted in bold (p-value < 0.05). Asterisk indicate that hybrid sequences were included to calculate statistics.
